# Supplementary material for: Vesicle fusion intermediates obtained from the self-assembly of a cationic platinum(ii) complex with sulfonate terminated polystyrenes
Source: Royal Society of Chemistry journal article supplement (doi:10.1039/c3ra45574b), 2013-12-09
Supplement: c3ra45574b.pdf [file c3ra45574b.pdf]

## Supplementary Information

### Direct observation of vesicle fusion intermediates obtained from a cationic platinum(II) complex with sulfonate terminated polystyrenes

Fang Qu, Nijuan Liu and Weifeng Bu\*

Key Laboratory of Nonferrous Metals Chemistry and Resources Utilization of Gansu Province, State Key Laboratory of Applied Organic Chemistry, and College of Chemistry and Chemical Engineering, Lanzhou University, Lanzhou City, Gansu Province, China, buwf@lzu.edu.cn

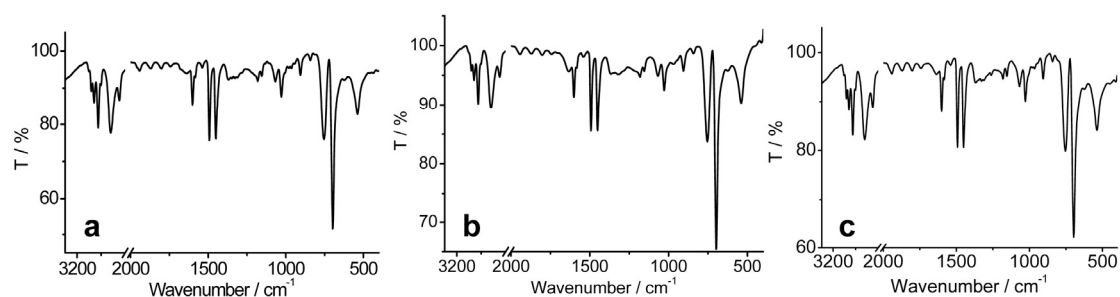

Fig. S1 Infrared spectra of SBC-1 (a), SBC-2 (b), and SBC-3 (c).

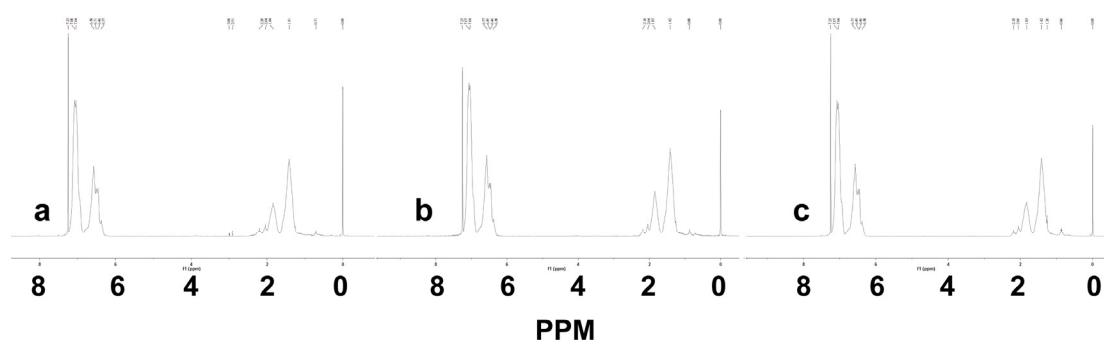

Fig. S2 <sup>1</sup>H NMR spectra of SBC-1 (a), SBC-2 (b), and SBC-3 (c).

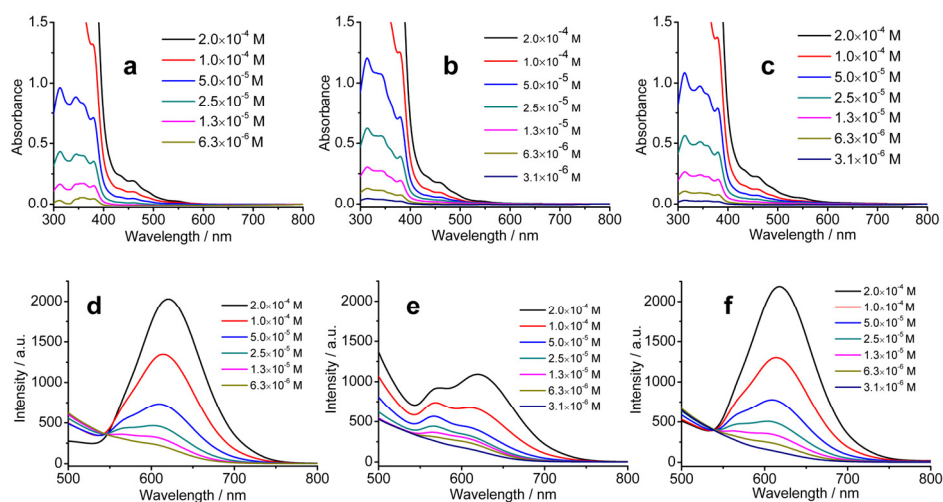

Fig. S3 UV-vis spectra of SBC-1 (a), SBC-2 (b), and SBC-3 (c). Emission spectra of SBC-1 (d), SBC-2 (e), and SBC-3 (f).

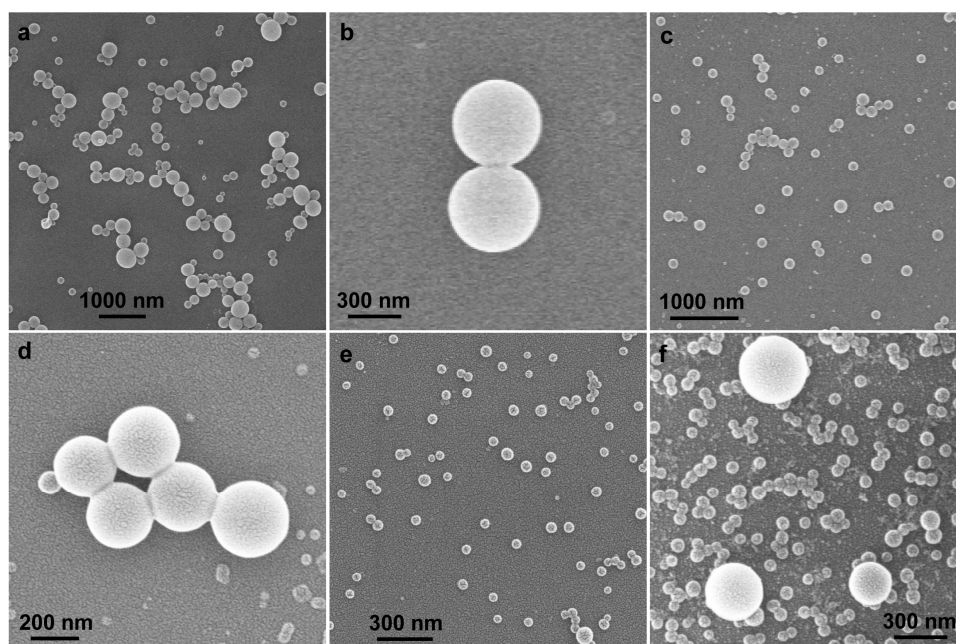

**Fig. S4** SEM images of SBC-1 (a and b), SBC-2 (c and d), and SBC-3 (e and f). The a, c, e images were obtained as drop-cast from 0.5 mg/mL chloroform/methanol (v/v = 1) solutions aged for 1 h onto glass substrates, whereas the b, d, f images were obtained as drop-cast from the solutions aged for 2.5, 7.5 and 36 h, respectively.

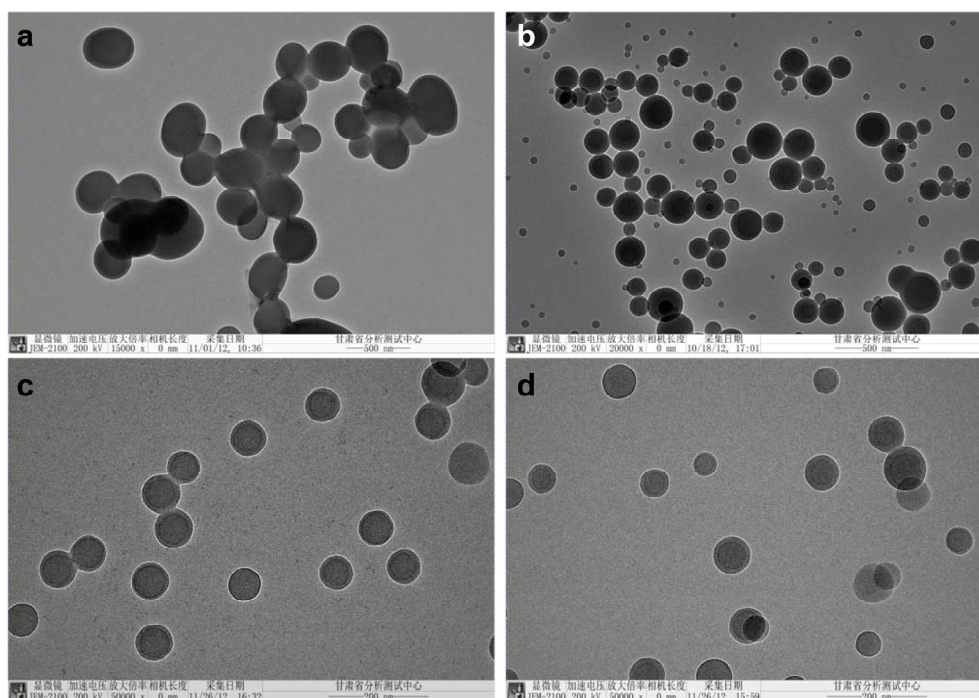

**Fig. S5** Representative TEM images of SBC-1 (a), SBC-2 (b) and SBC-3 (c and d) as drop-cast from 0.5 mg/mL chloroform/methanol (v/v = 1) solution aged for 1 h onto carbon-coated copper grids.

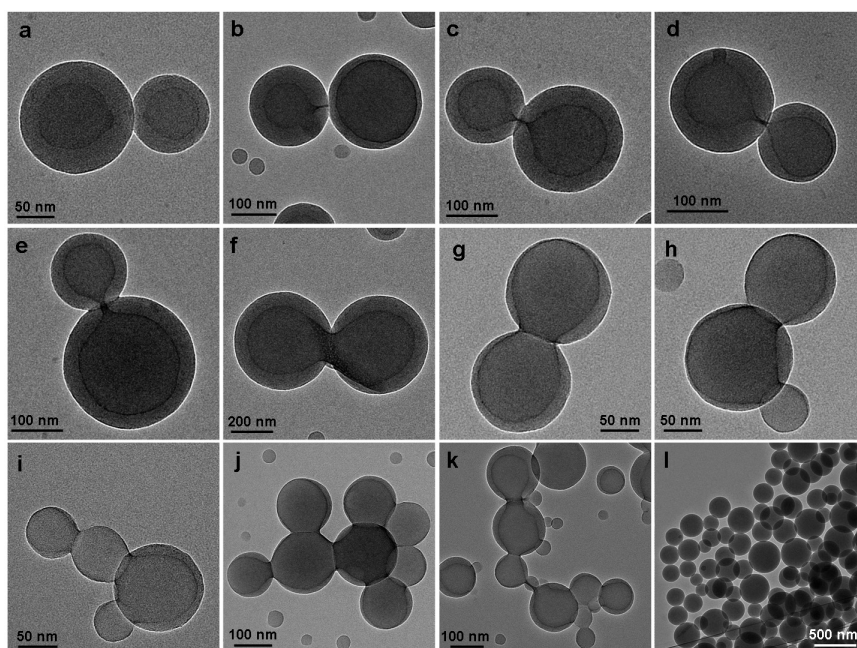

**Fig. S6** TEM images of SBC-2 as drop-cast from 0.5 mg/mL chloroform/methanol (v/v = 1) solution aged for 1 h (a-k) and 7.5 h (l) onto carbon-coated copper grids.

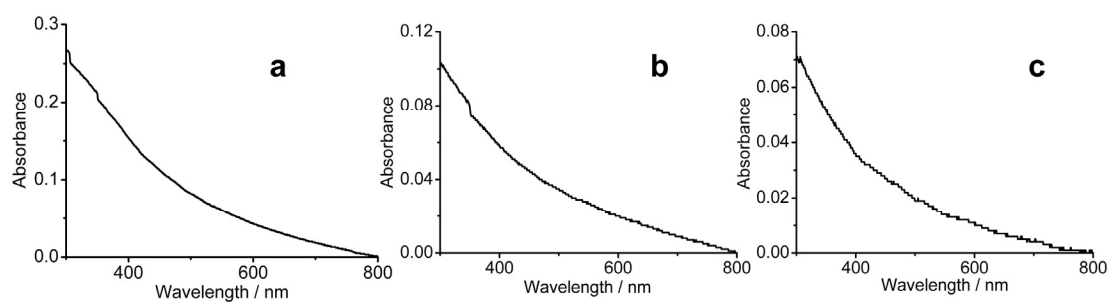

**Fig. S7** UV-vis spectra of the vesicle films of SBC-1 (a), SBC-2 (b), and SBC-3 (c).
